# Supplementary material for: α-Hemolysin of uropathogenic E. coli regulates NLRP3 inflammasome activation and mitochondrial dysfunction in THP-1 macrophages
Source: PubMed Central journal article supplement (PMC7387347; doi:10.1038/s41598-020-69501-1), 2020-07-28
Supplement: 41598_2020_69501_MOESM1_ESM.pdf [file 41598_2020_69501_MOESM1_ESM.pdf]

**$\alpha$ -Hemolysin of Uropathogenic *E.coli* regulates NLRP3 inflammasome activation and mitochondrial dysfunction in THP-1 macrophages**

Vivek Verma<sup>1</sup>, Parveen Kumar<sup>2</sup>, Surbhi Gupta<sup>1</sup>, Sonal Yadav<sup>1</sup>, Rakesh Singh Dhanda<sup>3</sup>, Henrik Thorlacius<sup>4</sup> and Manisha Yadav<sup>1\*</sup>

**Figure 1**

Lane 1 2 3 4

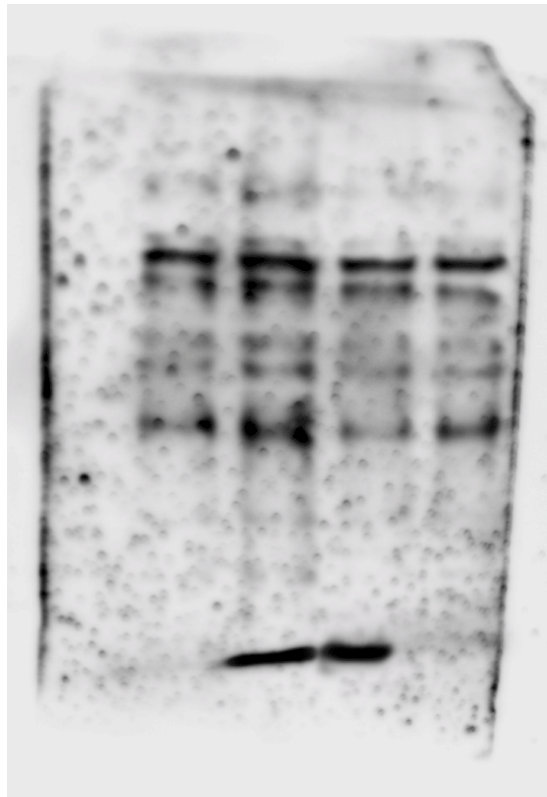

37 kDa

17 kDa

IL-1 $\beta$

Lane 1 2 3 4

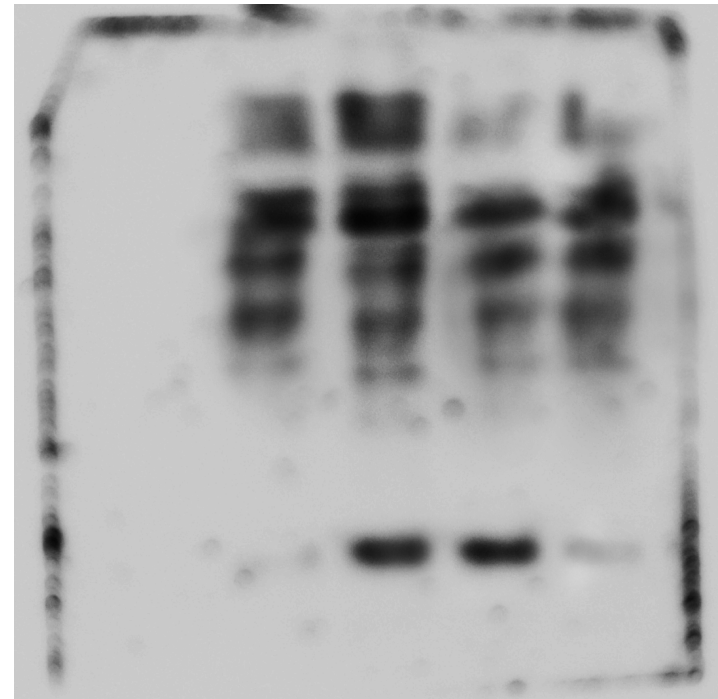

45 kDa

20 kDa

Caspase-1

Lane 1 2 3 4

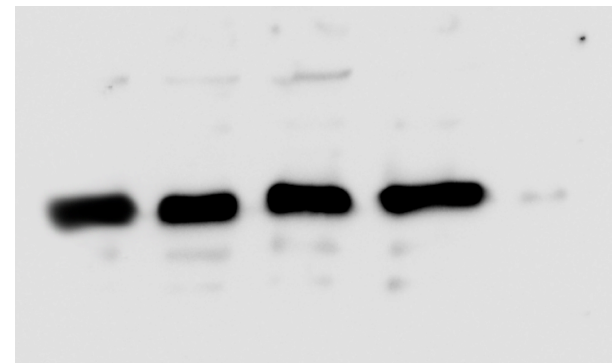

37 kDa

GAPDH

**Lane 1: Mock**

**Lane 2: Nigericin**

**Lane 3: HlyA**

**Lane 4: ProHlyA**

**Cont.**

**Figure 1**

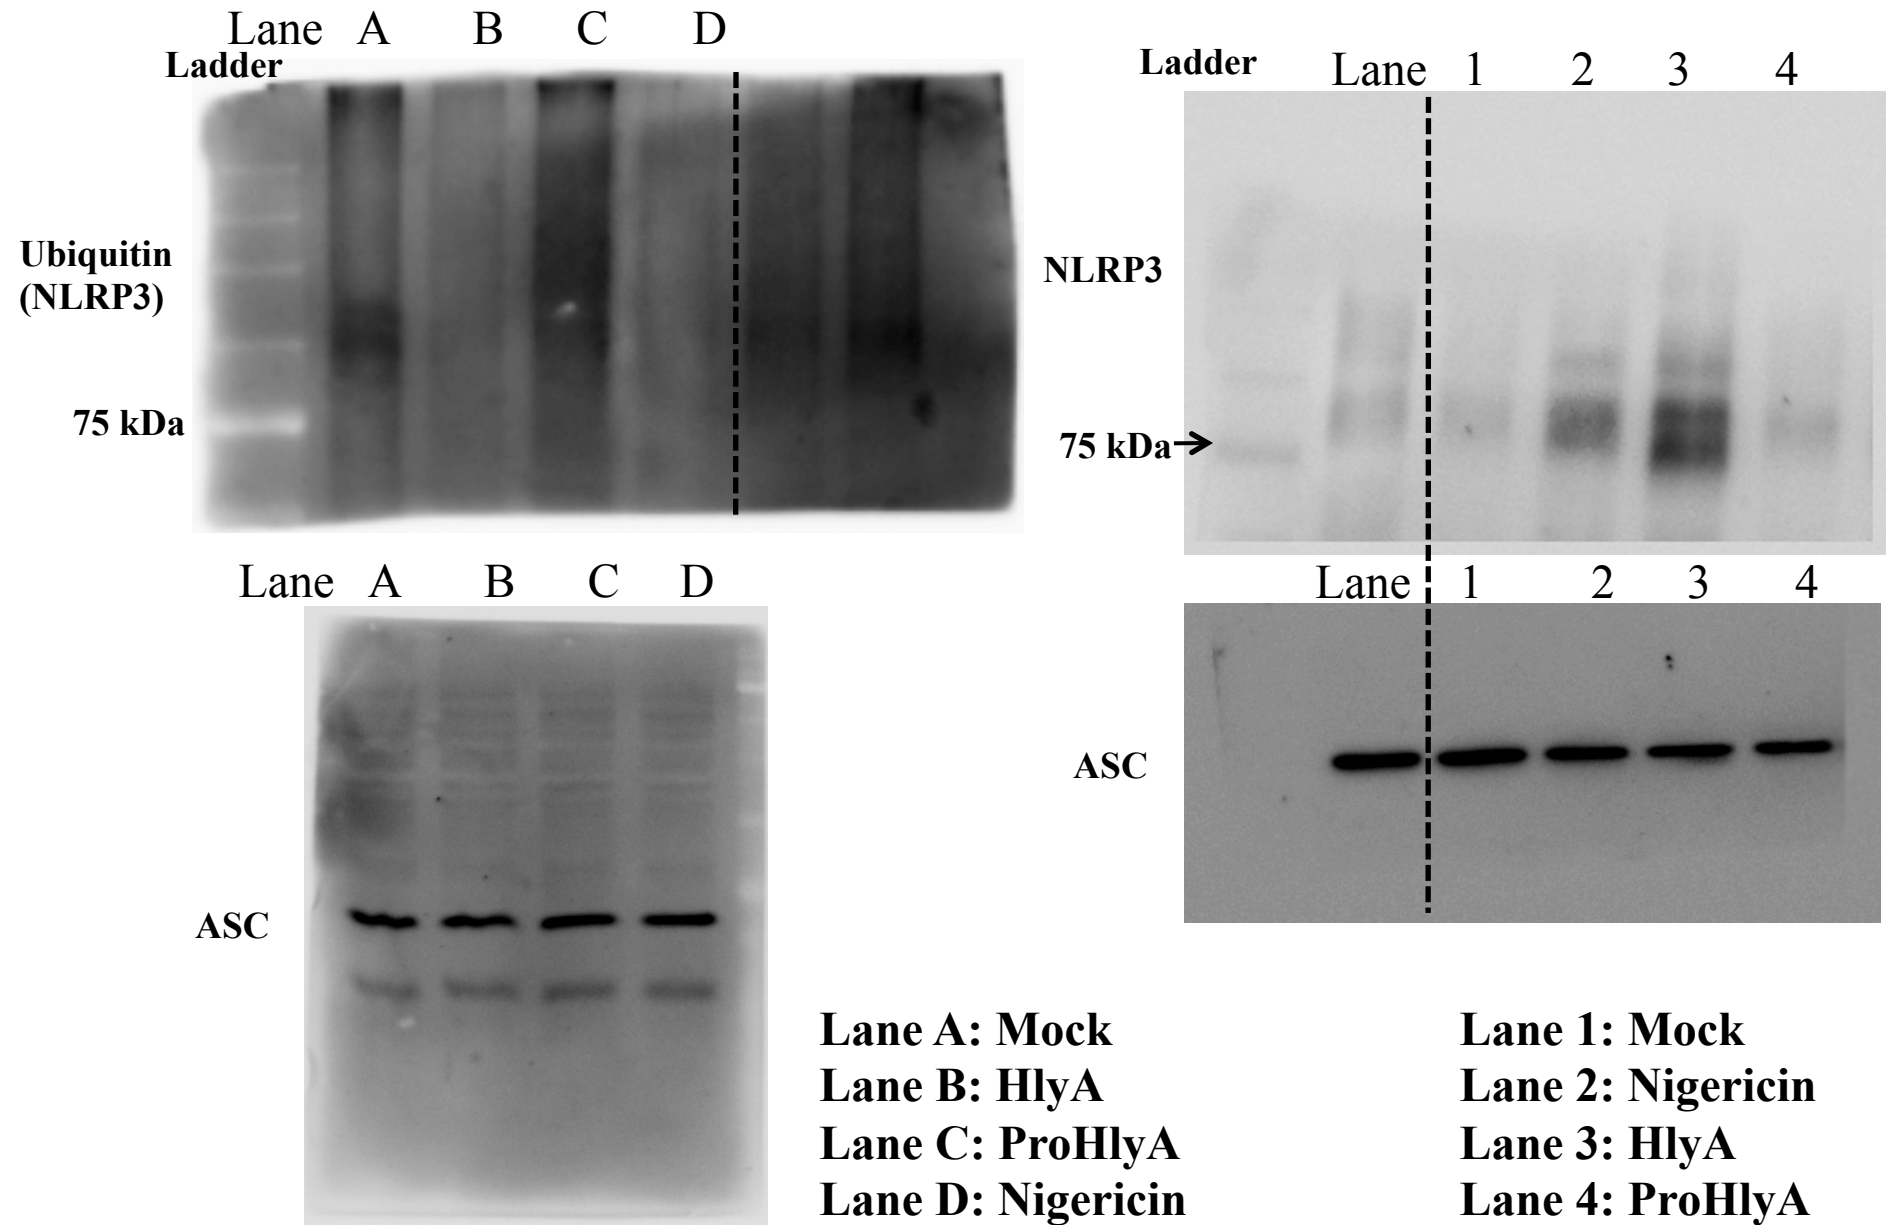

**Figure 2**

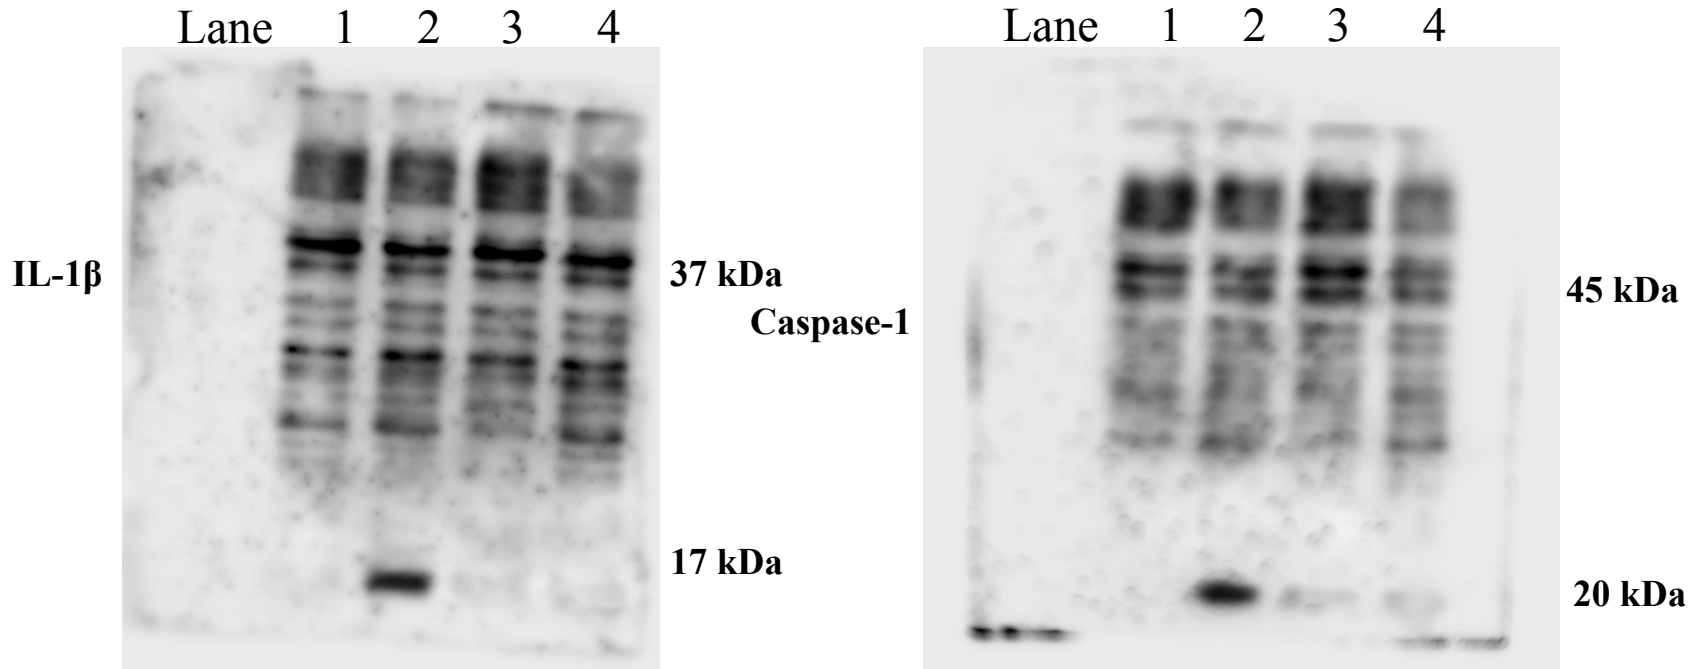

**Lane 1: Mock**  
**Lane 2: HlyA**  
**Lane 3: HlyA + KCl**  
**Lane 4: HlyA + Gli**

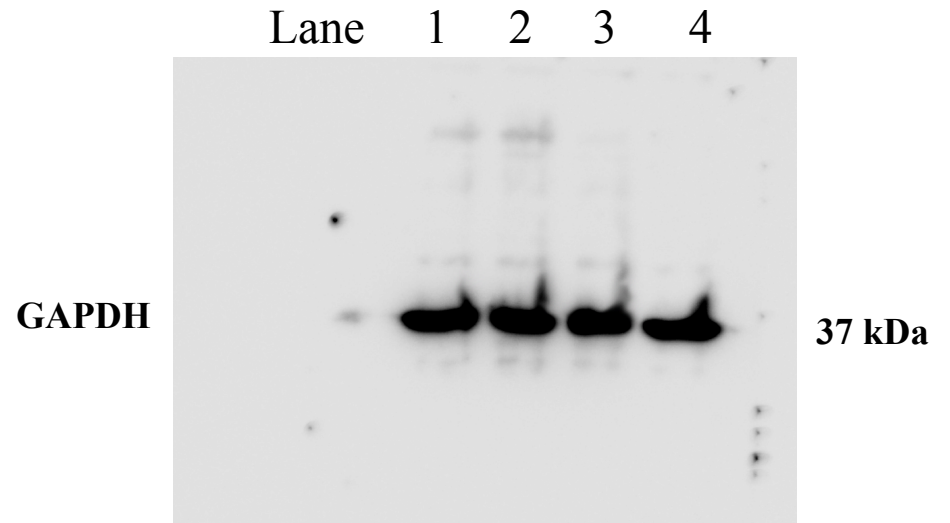

**Cont.**

**Figure 2**

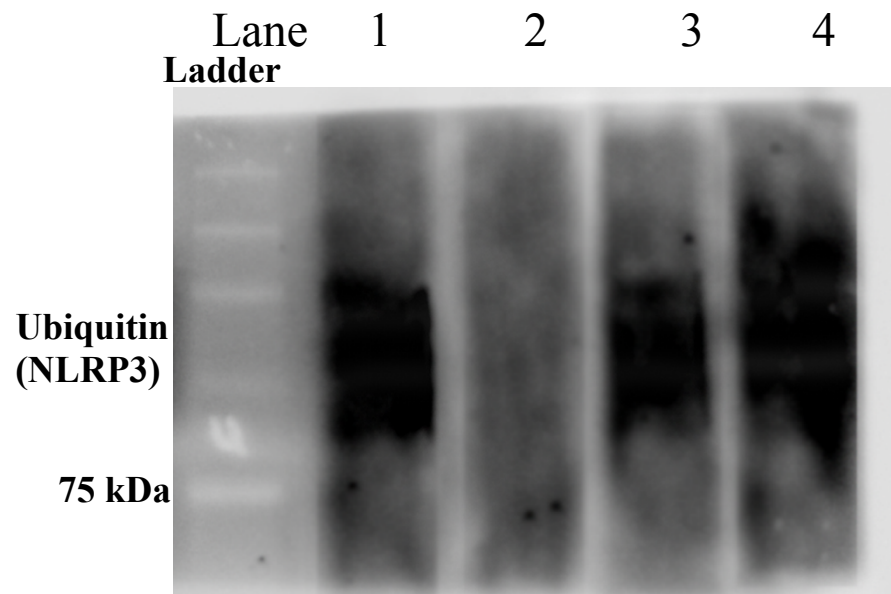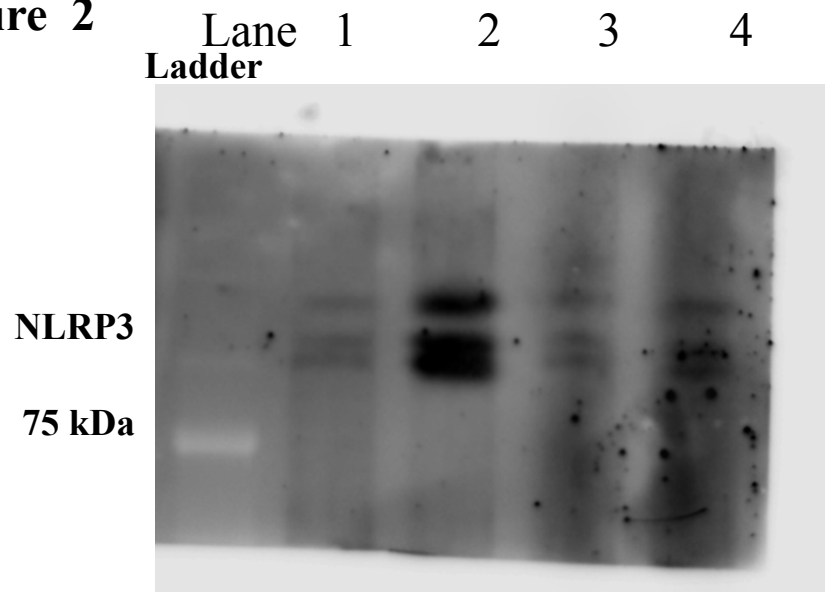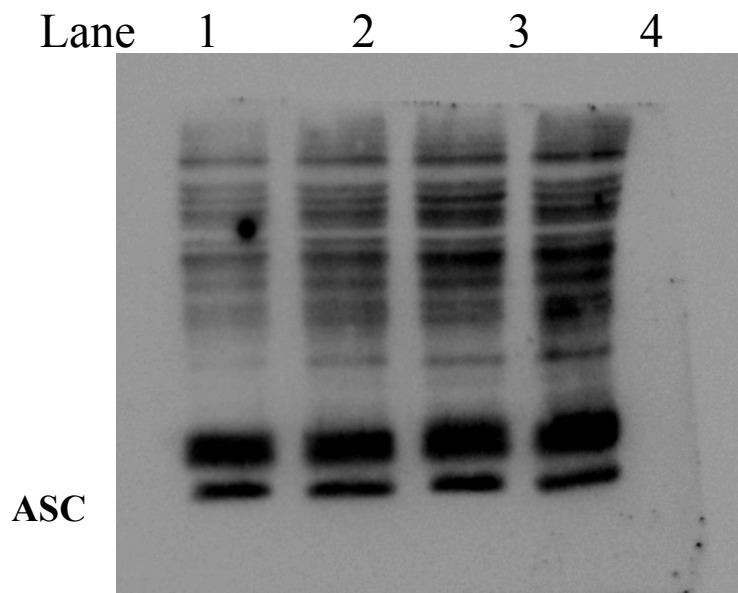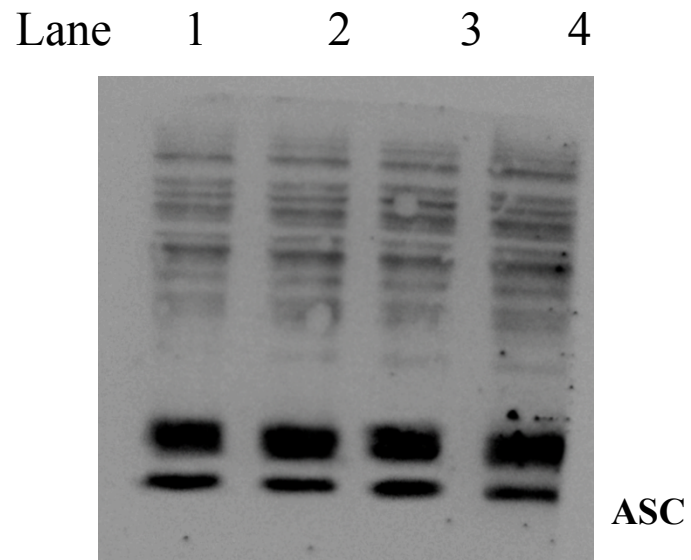

**Lane 1: Mock**  
**Lane 2: HlyA**  
**Lane 3: HlyA + KCl**  
**Lane 4: HlyA + Gli**

**Figure 3**

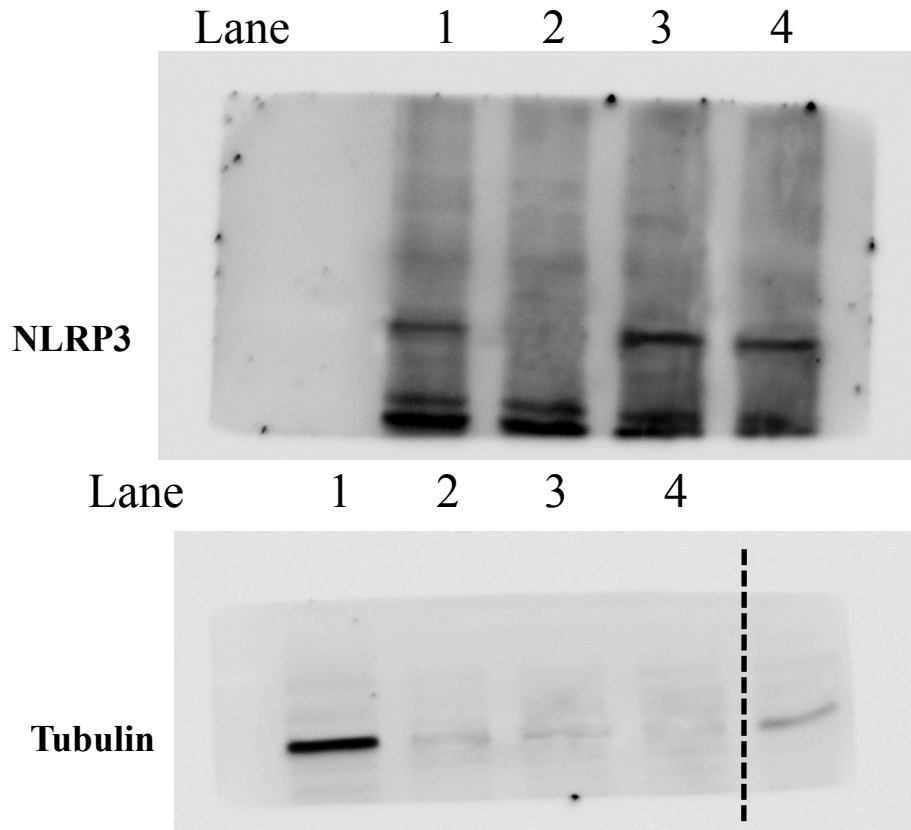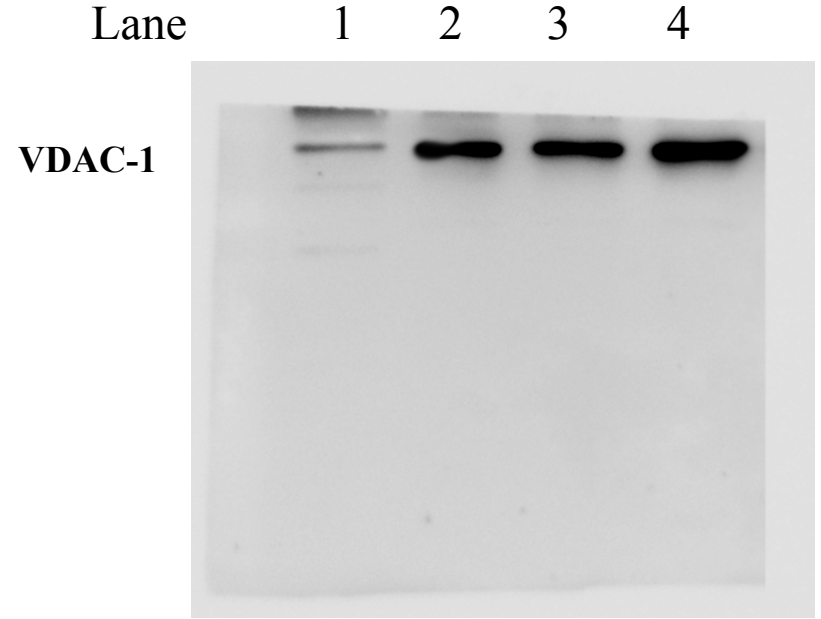

**Lane 1: Mock (Cytoplasmic lysate)**  
**Lane 2: Mock (Mitochondrial Lysate)**  
**Lane 3: HlyA (Mitochondrial Lysate)**  
**Lane 4: Nigericin (Mitochondrial Lysate)**

**Figure 7**

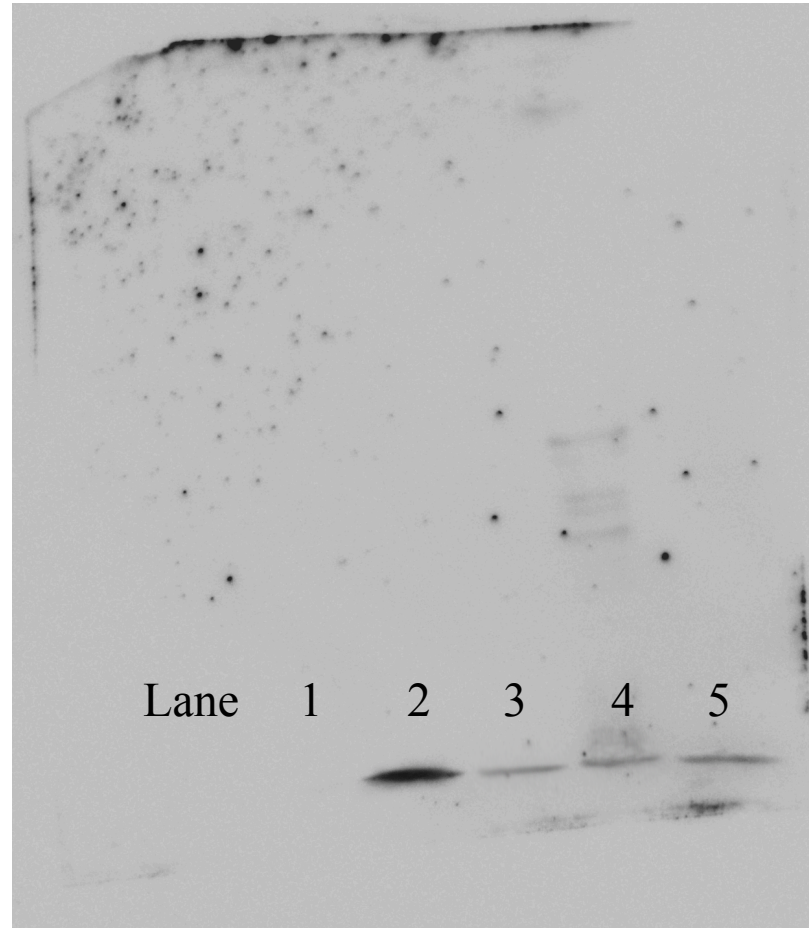

**Lane 1: Mock**

**Lane 2: HlyA**

**Lane 3: HlyA + MitoTEMPO**

**Lane 4: HlyA + KCl**

**Lane 5: HlyA + Gli**
